# **Colistin heteroresistance in *Enterobacter cloacae* is mediated by PmrAB-independent 4-amino-4-deoxy-L-arabinose addition to lipid A**

Katie N. Kang<sup>a</sup>, Dustin R. Klein<sup>b</sup>, Misha I. Kazi<sup>a</sup>, François Guérin<sup>c</sup>, Vincent Cattoir<sup>d</sup>, Jennifer S. Brodbelt<sup>b</sup>, and Joseph M. Boll<sup>a,#</sup>

Affiliations:

<sup>a</sup>Department of Biology, University of Texas at Arlington, Arlington, TX, USA

<sup>b</sup>Department of Chemistry, University of Texas at Austin, Austin, TX, USA

<sup>c</sup>Department of Clinical Microbiology, Caen University Hospital, Caen, France; EA4655, University of Caen Normandie, Caen, France

<sup>d</sup>Department of Clinical Microbiology and National Reference Center for Antimicrobial Resistance (Lab Enterococci), Rennes University Hospital, Rennes, France; Inserm Unit U1230, University of Rennes 1, Rennes, France

#Correspondence:

Joseph M. Boll

The University of Texas at Arlington

Arlington TX, 76010

Phone (817) 272-4045

Email: [joseph.boll@uta.edu](mailto:joseph.boll@uta.edu)

**Running Title:** Regulation of colistin heteroresistance in *E. cloacae*

K.N.K. and D.R.K contributed equally to this work.

Abstract word count: 221

Text word count (excluding references, table footnotes, and figure legends): 4,993

## Abstract

The *Enterobacter cloacae* complex (ECC) consists of closely-related, but genetically distinct bacteria commonly associated with the human microbiota. ECC have been increasingly isolated from healthcare-associated infections, demonstrating that these Enterobacteriaceae are emerging nosocomial pathogens. ECC strains can rapidly acquire multidrug resistance to conventional antibiotics. Cationic antimicrobial peptides (CAMPs) have served as therapeutic alternatives because they target the highly conserved lipid A component of the Gram-negative outer membrane to lyse the bacterial cell. Many Gram-negative Enterobacteriaceae fortify their outer membrane with cationic amine-containing moieties to protect from CAMP-inflicted lysis. The PmrAB two-component system (TCS) transcriptionally activates 4-amino-4-deoxy-L-arabinose (L-Ara4N) biosynthesis to result in amine moiety addition to lipid A in many Enterobacteriaceae such as *E. coli* and *Salmonella*. In contrast, PmrAB in *E. cloacae* is dispensable for CAMP resistance. Instead, fitness against CAMPs presents as heteroresistance, or a subpopulation of cells that exhibit clinically significant increases in resistance levels compared to the majority population. We demonstrate that *E. cloacae* lipid A is modified with L-Ara4N to induce CAMP heteroresistance and that the regulatory mechanism is independent of the PmrAB<sub>Ecl</sub> TCS. We show that the response regulator, PhoP<sub>Ecl</sub>, directly binds to the *arnB*<sub>Ecl</sub> promoter to induce expression of L-Ara4N biosynthesis and PmrAB-independent addition to the lipid A disaccharolipid. Therefore, we have identified a mechanism of ECC colistin heteroresistance that directly involves the PhoPQ system.

# **Importance**

Members of the *Enterobacter cloacae* complex (ECC) are Gram-negative nosocomial pathogens that have emerged within healthcare facilities around the world. ECC infections are associated with immunocompromised patients and infections are often life threatening. The cationic antimicrobial peptide, colistin (polymyxin E), is a last-line treatment option to combat Gram-negative multidrug resistant infections. However, many ECC intrinsically encode a colistin heteroresistance mechanism. Our analysis to characterize colistin heteroresistance in *E. cloacae* revealed that 4-amino-4-deoxy-L-arabinose is conjugated to the lipid A disaccharolipid to protect from colistin-mediated lysis. Additionally, this mechanism is directly regulated by the PhoPQ<sub>Ecl</sub> two-component system. Elucidation of outer membrane antimicrobial resistance modifications and their regulatory pathways in *E. cloacae* isolates will advance our understanding of CAMP heteroresistance.

## Introduction

Gram-negative bacteria assemble a highly conserved outer membrane (OM) barrier, which restricts diffusion of toxins such as antibiotics into the cell. Glycerophospholipids comprise the periplasmic monolayer of the asymmetric lipid bilayer, while the surface-exposed monolayer is enriched with lipopolysaccharide (LPS). The LPS glycolipid is organized into three domains; the O-antigen carbohydrate repeat, core oligosaccharide, and the membrane anchor, lipid A (1). The lipid A domain is the bioactive portion of LPS and robustly activates the human Toll-like receptor 4 (TLR-4) and myeloid differentiation factor 2 (MD-2) immune complex to induce an immune response (1–4). Gram-negative pathogens encode highly conserved regulatory mechanisms to promote survival by responding to immune and environmental signals (5–7). Specific signaling pathways regulate lipid A modifications to alter TLR-4/MD-2 recognition and to fortify the OM against immune effectors and antimicrobials, which promotes survival in the host (8).

Lipid A modification enzymes are transcriptionally regulated by two-component systems (TCS) (9, 10). A prototypical TCS consists of an inner membrane sensor histidine kinase (HK) that senses a specific signal and a cognate cytoplasmic response regulator (RR), which alters expression of target genes. Signal recognition induces phosphotransfer and activation of the cognate RR, which typically results in DNA binding to alter gene expression (11). Most HKs encode a phosphatase domain that dephosphorylates the RR when the activating signal is depleted (6, 12). These highly conserved signaling systems enable bacteria to tightly regulate expression of target genes.

The PmrAB and PhoPQ TCSs are well-studied phosphorelay signaling systems that regulate lipid A modifications in response to specific environmental signals (13–15). PmrAB and

PhoPQ are highly conserved among pathogenic Enterobacteriaceae, including *Citrobacter*, *Escherichia*, *Klebsiella*, *Salmonella*, and *Shigella* (5). PmrAB responds to high  $\text{Fe}^{3+}$  concentrations, cationic antimicrobial peptides (CAMPs), and slightly acidic pH to directly activate *eptA* (also known as *pmrC*) and *arn* operon expression (16–18), which encode phosphoethanolamine (pEtN) and 4-amino-4-deoxy-L-arabinose (L-Ara4N) transferases, respectively (19–22). Both enzymes transfer the respective amine-containing chemical moiety onto lipid A at the inner membrane, prior to LPS surface transport (19, 22). Cationic amine addition to the lipid A domain of LPS neutralizes the surface charge to protect the cell from CAMP-mediated lysis (19, 21).

PhoPQ is activated in response to depletion of divalent cations such as  $\text{Mg}^{2+}$  and  $\text{Ca}^{2+}$  and the presence of CAMPs (13, 15, 23). PhoPQ phosphotransfer directly activates transcription of genes encoding PagL (only in *Salmonella* (8)) and PagP, which add or remove acyl chains from lipid A, respectively (13, 24–26). While the PmrAB and PhoPQ TCSs each regulate distinct subsets of genes, the independent signaling pathways also converge through crosstalk (27, 28); PmrAB-dependent gene expression is also indirectly regulated by the PhoPQ TCS through the intermediate protein, PmrD. PmrD binds phospho-PmrA to prevent PmrB-mediated dephosphorylation (27, 29–31). Constitutive PmrA-dependent gene expression increases pEtN and L-Ara4N lipid A modifications.

The *Enterobacter cloacae* complex (ECC) is composed of thirteen closely-related Gram-negative bacterial clusters (designated C-I to C-XIII) (32). ECC are typically associated with the host microbiota, but many clusters cause hospital-acquired infections, especially in immunocompromised patients (33). Infections manifest in a wide range of host tissues with symptoms including skin, respiratory tract, urinary tract, wound and blood infections (34). ECC

infections have increasingly emerged in nosocomial settings and are problematic because they encode multidrug resistance (MDR) mechanisms, which limits treatment options (33, 35–37). Alternative last-line therapeutics used to treat MDR Gram-negative infections include the CAMP, colistin (polymyxin E), which binds the lipid A portion of LPS to perturb the outer membrane and lyse the bacterial cell. Despite the success of colistin treatment as a last-line therapeutic to combat Gram-negative infections (38, 39), many ECC clusters demonstrated heteroresistance, where a subset of the clonal population is colistin resistant (35, 40–42). We do not fully understand the underlying molecular mechanism(s) that regulate colistin heteroresistance in ECC; further characterization will advance our understanding of antimicrobial resistance and could help improve treatment strategies.

Previous reports showed that colistin heteroresistance naturally occurs within clonal ECC clusters, including *E. cloacae* (cluster XI) (35). Moreover, colistin heteroresistance in *E. cloacae* was induced by innate immune defenses within a murine infection model to lead to treatment failure (40). Transcriptional analysis of susceptible and resistant populations suggested that pEtN and L-Ara4N lipid A modifications contribute to heteroresistance (40) and PhoPQ contributed to regulation (35, 40), as described in other Enterobacteriaceae (5). However, it was not established that the lipid A modifications actually occur, nor has PhoPQ-dependent, PmrAB-independent regulation of colistin heteroresistance been fully described in *E. cloacae* or other ECC isolates.

Herein, we demonstrate that *E. cloacae* colistin heteroresistance is directly regulated by PhoPQ<sub>Ecl</sub> to induce L-Ara4N modification of lipid A. In contrast, many other Enterobacteriaceae directly regulate L-Ara4N modification of lipid A via the PmrAB TCS. The PhoP<sub>Ecl</sub> response regulator directly binds to the promoter region of *arnB*<sub>Ecl</sub>, which is the first gene of a seven-gene operon (*arnBCADTEF*<sub>Ecl</sub>). In contrast, PhoP<sub>Ecl</sub> does not bind the *arnB* promoter region in *E. coli*.

Transcriptomics analysis supports a model of PhoPQ-dependent, PmrAB-independent *arn<sub>Ecl</sub>* regulation. Furthermore, L-Ara4N modification of lipid A increased in response to growth in limiting  $Mg^{2+}$ , which induced colistin resistance in a PhoPQ<sub>Ecl</sub>-dependent manner.

## Results

### Colistin heteroresistance in *E. cloacae* is regulated by PhoPQ<sub>Ecl</sub>, but not PmrAB<sub>Ecl</sub>.

To elucidate the underlying mechanisms that regulate colistin heteroresistance in ECC, we analyzed a collection of *E. cloacae* subsp. *cloacae* strain ATCC 13047 genetic mutants by calculating the colony forming units (CFUs) during exponential growth in the absence and presence of colistin (Fig 1A). While wild type and all mutant *E. cloacae* strains grew in standard growth media,  $\Delta phoPQ_{Ecl}$  was not viable when 10  $\mu g/ml$  of colistin was added to the media. Clinical resistance to colistin is defined as  $>4 \mu g/ml$  (43). The decrease in  $\Delta phoPQ_{Ecl}$  cell viability suggested that PhoPQ<sub>Ecl</sub> signaling is required for colistin heteroresistance. Interestingly, viability was not altered when the  $\Delta pmrAB_{Ecl}$  mutant was grown in colistin, which implied that PmrAB<sub>Ecl</sub> does not regulate colistin heteroresistance. Furthermore, wild type *E. cloacae* grown in colistin demonstrated approximately ten-fold less CFUs at hour two (P value  $<0.05$ ), suggesting that there was a survival defect in early logarithmic growth phase. However, the fitness defect was no longer significant at hour three and by hour four, CFUs were equivalent to growth without colistin (Fig 1A).

Due to reports of colistin heteroresistance in *E. cloacae* and other ECC strains (35, 40), we subjected wild type,  $\Delta phoPQ_{Ecl}$ ,  $\Delta phoPQ_{Ecl}/pPhoPQ_{Ecl}$ , and  $\Delta pmrAB_{Ecl}$  *E. cloacae* to colistin E-test strip analysis, which provides a convenient method to observe heteroresistance (Fig S1). Squatter colonies within the zone of inhibition indicated colistin heteroresistance in wild type,

$\Delta phoPQ_{Ecl}/pPhoPQ_{Ecl}$ , and  $\Delta pmrAB_{Ecl}$  strains, but not  $\Delta phoPQ_{Ecl}$ . We confirmed colistin heteroresistance using population analysis profiling (PAP) (Table 1). Minimal inhibitory concentration (MIC) values were calculated using the broth microdilution (BMD) method (Table 1). Wild type,  $\Delta phoPQ_{Ecl}/pPhoPQ_{Ecl}$ , and  $\Delta pmrAB_{Ecl}$  *E. cloacae* all demonstrated MICs >256  $\mu\text{g/ml}$ , while the  $\Delta phoPQ_{Ecl}$ ,  $\Delta phoPQ_{Ecl}/pPhoPQ_{H277A}$ ,  $\Delta phoPQ_{Ecl}/pPhoP_{D56A}Q$  and  $\Delta arn_{Ecl}$  (*arnBCADTEF<sub>Ecl</sub>*) MIC was 0.5  $\mu\text{g/ml}$ . Together, these studies confirm that  $PhoPQ_{Ecl}$  signal transduction and the *arn<sub>Ecl</sub>* biosynthetic operon (L-Ara4N) are required for colistin heteroresistance in *E. cloacae*.

Since lipid A modifications induce colistin resistance in pathogenic Enterobacteriaceae (5), we analyzed wild type and mutant *E. cloacae* lipid A for modifications.  $^{32}\text{P}$ -radiolabelled lipid A was isolated and chromatographically separated based on hydrophobicity. As controls, we also analyzed lipid A from *E. coli* strain W3110 (Fig 1B, lane 1), which does not significantly modify its lipid A, and strain WD101 (Fig 1B, lane 9), which constitutively expresses *pmrA* to produce modified lipid A (19). Thin layer chromatography (TLC) analysis indicated that wild type *E. cloacae* produced a mixture of lipid A consistent with modified and unmodified species (Fig 1B, lane 2).  $\Delta phoPQ_{Ecl}$  and the  $\Delta arn_{Ecl}$  strains did not produce modified lipid A (Fig 1B, lanes 3 and 8).  $PhoPQ$  complementation fully restored production of modified lipid A in the *phoPQ* mutant (Fig 1B, lane 4). Furthermore, site-directed mutagenesis to substitute H277 in  $PhoQ_{Ecl}$  or D57 in  $PhoP_{Ecl}$  with alanine limited lipid A assembly to only unmodified species (Fig 1B lanes 5 and 6). These results confirm that  $PhoPQ_{Ecl}$  phosphotransfer and L-Ara4N biosynthesis are essential for lipid A modification in *E. cloacae*.

Indirect  $PhoPQ$  regulation of lipid A modifications have been described and are conserved among Enterobacteriaceae (5).  $PhoPQ$  directly activates *PmrD* expression, which



binds PmrA to induce PmrAB-dependent pEtN and L-Ara4N lipid A modifications (27). In contrast, *E. cloacae* does not encode a PmrD homolog (44). Furthermore, the *pmrAB<sub>Ecl</sub>* mutant assembled a modified lipid A, similar to wild type (Fig 1B, lane 7), and exhibited colistin heteroresistance (Fig 1A, Table 1, Fig S1A), suggesting that PmrAB<sub>Ecl</sub> does not regulate colistin heteroresistance in *E. cloacae*. Our data contrasts with previous reports describing lipid A modification regulatory pathways in other Enterobacteriaceae, which cannot modify lipid A with L-Ara4N or pEtN when PmrAB signaling is disrupted (19–22, 27).

The lipid A anchor of LPS is a pathogen associated molecular pattern (PAMP) that is bound with high affinity by the mammalian host TLR-4/MD-2 complex (45), which activates a proinflammatory response to clear the bacterial infection (46). Structural alterations to lipid A can dramatically alter TLR-4/MD-2-dependent host immune activation (2) and a previous report nicely demonstrated that *E. cloacae* colistin heteroresistance was induced by innate immune effectors (40). Therefore, we examined if *E. cloacae* containing modified or unmodified lipid A would differentially activate TLR-4/MD-2 in a human embryonic kidney reporter cell line (HEK-blue) (2). Wild type and *phoPQ<sub>Ecl</sub>* mutant strains stimulated TLR-4/MD-2-dependent activation equally (Fig S1B), suggesting that lipid A modifications do not significantly alter host immune recognition. Reporter activation by *E. cloacae* lipid A was attenuated compared to *E. coli* lipid A at higher cell densities, suggesting differential recognition by the human TLR-4/MD-2 complex. The Gram-positive *Staphylococcus aureus* did not produce lipid A and did not stimulate the TLR-4/MD-2 complex (Fig S1B). Thus, while PhoPQ<sub>Ecl</sub>-dependent lipid A modifications contribute to CAMP resistance in *E. cloacae*, they do not significantly affect innate immune recognition and reactivity.

## Determination of *E. cloacae* lipid A modifications.

In order to define outer membrane modifications in *E. cloacae*, we isolated lipid A from wild type and  $\Delta phoPQ_{Ecl}$ . Purified lipid A was analyzed by direct infusion nanoESI. The MS1 spectra with a range of  $m/z$  750-2000 are shown in Figure S2. The expanded MS1 spectrum ( $m/z$  850-1200) of lipid A isolated from wild type *E. cloacae* demonstrated three distinct modifications: (i) addition of either one or two L-Ara4N moieties (red), (ii) palmitate ( $C_{16:0}$ ) addition (green), and (iii) hydroxylation (Fig 2A). The MS1 spectrum of lipid A isolated from  $\Delta phoPQ_{Ecl}$  did not produce L-Ara4N modified lipid A (Fig 2B). Hydroxyl addition was not labeled for simplicity, but correlates with a  $m/z$  shift of 8 of the doubly-charged molecular ions. Higher-energy collisional dissociation (HCD) and ultraviolet photodissociation (UVPD) MS/MS spectra were obtained for the ions of  $m/z$  1042.68 and 1161.79 from wild type and the ions of  $m/z$  911.62 and 1030.73 from  $\Delta phoPQ_{Ecl}$  *E. cloacae* (Fig S3, S4, S5 and S6). Analysis of the MS/MS spectra from wild type ( $m/z$  1042.68) indicated PhoPQ<sub>Ecl</sub>-dependent addition of L-Ara4N at both the 1- and 4'-phosphates (Fig S3). The MS/MS spectra for the ion of  $m/z$  1161.79 (wild type *E. cloacae*) showed addition of L-Ara4N at both the 1- and 4'-phosphates and palmitate addition to the R-2-hydroxymyristate (Fig S4). Analysis of lipid A from the *phoPQ<sub>Ecl</sub>* mutant ( $m/z$  911.62) completely lacked L-Ara4N modified lipid A (Fig S5) and analysis of the  $m/z$  1030.73 ion from the *phoPQ<sub>Ecl</sub>* mutant demonstrated that palmitate addition at the R-2-hydroxymyristate position of lipid A occurred independent of PhoPQ<sub>Ecl</sub> (Fig S6).

Based on transcriptomics studies, a previous report suggested that *E. cloacae* adds pEtN and L-Ara4N to lipid A to develop colistin heteroresistance (40). However, our genetic and high resolution mass spectrometry analysis demonstrate that only L-Ara4N modifies the 1- and 4'-phosphates of lipid A in a PhoPQ<sub>Ecl</sub>-dependent manner (Fig 2A and B) and this amine-containing

modification correlates with colistin heteroresistance (Fig 1A and Table 1).

# **L-Ara4N lipid A modifications are dependent on PhoP<sub>Ecl</sub>, but not PmrAB<sub>Ecl</sub>.**

To further characterize lipid A modifications in the  $\Delta pmrAB_{Ecl}$  mutant, we analyzed purified lipid A using MALDI-TOF mass spectrometry. While wild type *E. cloacae* produced a lipid A mixture, which included L-Ara4N modified lipids (Fig S7A and B), analysis of  $\Delta phoPQ_{Ecl}$  and  $\Delta arn_{Ecl}$  indicated that L-Ara4N modified lipid A were not present. Expression of PhoP<sub>Ecl</sub> *in trans* restored L-Ara4N modified lipid A in the  $\Delta phoPQ_{Ecl}$  mutant. Importantly,  $\Delta pmrAB_{Ecl}$  produced the L-Ara4N modification, similar to wild type (Fig S7A). The *m/z* of each prominent peak in our MALDI-MS analysis corresponded with the exact mass of an expected structure with only the L-Ara4N-containing structures demonstrating colistin resistance (Fig S7B). Here, we confirmed that L-Ara4N modification of lipid A in *E. cloacae* is not dependent on PmrAB<sub>Ecl</sub>.

# **PhoP<sub>Ecl</sub> directly binds to the *arnB*<sub>Ecl</sub> promoter.**

The *arn* operon is composed of seven genes and expression is driven by a promoter upstream of *arnB* (20). This genetic organization is conserved in *E. cloacae* as illustrated in Fig 3A. *phoP* expression is autoregulated in Enterobacteriaceae, where PhoP binds to the PhoP box where it interacts with RNA polymerase to induce transcription (47). The putative PhoP box in the *phoP* promoter region (*P<sub>phoP</sub>*) is conserved in *E. coli*, *Salmonella*, and *E. cloacae* (Fig 3B). Alignment of the *E. cloacae arnB* promoter region (*P<sub>arnB</sub>*) with *E. coli*, *Salmonella*, and *E. cloacae P<sub>phoP</sub>* suggested a putative PhoP box region. Importantly, *E. cloacae P<sub>arnB</sub>*, which encodes a putative PhoP box, is highly conserved among ECC. However, this feature was not encoded within *E. coli P<sub>arnB</sub>*, suggesting that regulatory mechanisms that control promoter activation are different

(Fig 3B).

We performed electrophoretic mobility shifts (EMSAs) using *E. cloacae* P<sub>arnB</sub> to determine if PhoP<sub>Ecl</sub> directly binds the promoter to activate *arnEcl* transcription. Increasing concentrations of purified PhoP<sub>Ecl</sub> (Fig S8) induced a shift of the biotinylated *arnB<sub>Ecl</sub>* promoter fragment, which contains the putative PhoP box binding motif (Fig 3C). Importantly, PhoP<sub>Ecl</sub> does not bind to *E. coli* P<sub>arnB</sub>, which does not encode the PhoP box motif (Fig 3C). Furthermore, the PhoP<sub>Ecl</sub>-*arnB<sub>Ecl</sub>* promoter interaction was abrogated when unlabeled *E. cloacae* P<sub>arnB</sub> was added in increasing ratios, as a competitive inhibitor. We also show that the interaction is specific because addition of noncompetitive DNA (poly dI-dC) did not reduce the PhoP<sub>Ecl</sub> and *E. cloacae* P<sub>arnB</sub> interaction (Fig 3D). Lastly, PhoP<sub>Ecl</sub> bound *E. cloacae* and *E. coli* P<sub>phoP</sub>, which both encode the nucleotide sequence specific to the PhoP box (Fig 3E). Together, these findings suggest that *E. cloacae* encodes a mechanism that enables L-Ara4N biosynthesis to respond directly to PhoPQ<sub>Ecl</sub>.

### RNA-sequencing analysis of the *phoPQ<sub>Ecl</sub>* and *pmrAB<sub>Ecl</sub>* mutants.

To better understand the PhoP<sub>Ecl</sub> and PmrAB<sub>Ecl</sub> regulatory products, we isolated and sequenced total RNA from wild type and mutant *E. cloacae* strains. A heat map illustrates the fold change of *arnEcl*, *phoPQ<sub>Ecl</sub>*, and *pmrAB<sub>Ecl</sub>* gene expression in the TCS mutants relative to wild type (Fig 4). Expression of the *arnEcl* genes were significantly down regulated in  $\Delta$ *phoPQ<sub>Ecl</sub>* compared to wild type, suggesting that activation of the pathway is dependent on PhoPQ<sub>Ecl</sub>. In contrast, *arnEcl* gene expression was not significantly altered in the  $\Delta$ *pmrAB<sub>Ecl</sub>* mutant relative to wild type.

**Colistin resistance increases within the *E. cloacae* population in response to limiting Mg<sup>2+</sup>.**

Together the transcriptomic analysis (Fig 4) and colistin heteroresistance in wild type *E. cloacae* (Fig 1A and Table 1) suggest constitutive addition of L-Ara4N to lipid A in a subset of the population under standard growth conditions. In *E. coli* and *Salmonella*, PhoPQ is activated by various signals, including low  $Mg^{2+}$  and CAMPs (13, 23, 25). PhoP activates PmrAB, which stimulates pEtN and L-Ara4N addition to lipid A (27). Here we analyzed if PhoPQ<sub>Ecl</sub> responds to similar physiological cues to induce colistin resistance in *E. cloacae*. Wild type and mutant *E. cloacae* were grown in N minimal medium with high (10 mM) or low (10  $\mu$ M)  $Mg^{2+}$  levels. All cultures were exposed to colistin at mid-logarithmic growth. Wild type and complemented *phoPQ<sub>Ecl</sub>* mutant strains grown in high  $Mg^{2+}$  demonstrated some susceptibility to 5 and 10  $\mu$ g/ml of colistin (Fig 5A, High  $Mg^{2+}$ ), suggesting colistin-susceptible and -resistant populations were present. When grown under limiting  $Mg^{2+}$  conditions, *E. cloacae* cells were resistant (Fig 5A, Low  $Mg^{2+}$ ). The *phoPQ<sub>Ecl</sub>* mutant demonstrated a fitness defect in either  $Mg^{2+}$  concentration when exposed to colistin (Fig 5A). These data suggest that PhoPQ<sub>Ecl</sub> induces colistin resistance in response to limiting  $Mg^{2+}$  growth conditions.

### **PhoPQ<sub>Ecl</sub> responds to limiting $Mg^{2+}$ conditions by inducing L-Ara4N lipid A modification.**

To determine if increased colistin resistance was dependent on L-Ara4N modification of lipid A, we isolated lipid A after growth in either low or high  $Mg^{2+}$ . TLC analysis demonstrated that wild type and the complemented *phoPQ<sub>Ecl</sub>* mutant primarily produced L-Ara4N-modified lipid A when  $Mg^{2+}$  concentrations were limiting (Fig 5B, Low  $Mg^{2+}$ ). In contrast, the same strains grown in excess  $Mg^{2+}$ , produced a mixture of modified and unmodified lipid A (Fig 5B, High  $Mg^{2+}$ ). Interestingly, growth in excess  $Mg^{2+}$  does not completely shut-off production of PhoPQ<sub>Ecl</sub>-dependent lipid A modification in *E. cloacae*, as was previously shown in *E. coli* (27). We did

observe a decrease in the relative amount of the di-L-Ara4N form while increasing the ratio of unmodified lipid A species (Fig 5B). Together, these studies suggest that a subset of the clonal *E. cloacae* population activates PhoPQ<sub>Ecl</sub>-dependent L-Ara4N of lipid A under standard growth conditions. However, depletion of Mg<sup>2+</sup> induces PhoPQ<sub>Ecl</sub> signaling to enhance L-Ara4N modification (Fig 5B) and colistin resistance (Fig 5A) throughout the population.

## Discussion

*E. cloacae* and other ECC members encode PmrAB<sub>Ecl</sub> and PhoPQ<sub>Ecl</sub> homologs, which we hypothesized would function in a signaling pathway to regulate L-Ara4N and pEtN modification of lipid A based on previous transcriptomics analysis of resistant and susceptible populations (40) and because these lipid A modifications are highly conserved among Enterobacteriaceae (5). However, our genetic and high-resolution mass spectrometry analysis of *E. cloacae* lipid A determined that colistin heteroresistance in *E. cloacae* was mediated by PhoPQ<sub>Ecl</sub>-dependent L-Ara4N lipid A modification. Therefore, we have identified a mechanism of ECC colistin heteroresistance that involves the PhoPQ system.

*E. cloacae* and other ECC members do not encode a PmrD homolog, which couples PhoPQ signal transduction to regulation of PmrA-dependent genes in many Enterobacteriaceae (5). Moreover, PmrA<sub>Ecl</sub> shares only 52% identity with *E. coli* PmrA and PmrB<sub>Ecl</sub> shares only 57% identity with *E. coli* PmrB, suggesting the L-Ara4N lipid A modification pathway in *E. cloacae* diverged from other Enterobacteriaceae. We confirmed direct binding of PhoP<sub>Ecl</sub> to the *arnB*<sub>Ecl</sub> promoter, which supports a model where L-Ara4N addition to lipid A and colistin heteroresistance in *E. cloacae* is dependent on PhoPQ<sub>Ecl</sub>, but not PmrAB<sub>Ecl</sub>.

Research from other groups has outlined a complex regulatory network in *E. coli* and

*Salmonella* that tightly regulates lipid A L-Ara4N and EptA modifications (19–22, 27). We hypothesize that uncoupling PmrAB<sub>Ecl</sub> signal transduction from L-Ara4N modification bypasses a key regulatory checkpoint, which likely promotes constitutive *arn*<sub>Ecl</sub> transcription and L-Ara4N modification of lipid A in a subset of the clonal *E. cloacae* population. Since selection has driven *E. cloacae* and other ECC to maintain an altered lipid A modification signaling network, we predict that it is advantageous to maintain a CAMP resistant subpopulation in some environments. Presumably, the alternative regulatory mechanism promotes bacterial fitness in environments specific to its commensal and pathogenic niches.

While the dynamics of the regulatory cascades that control lipid A modification in Gram-negative bacteria have been extensively characterized in *E. coli* and *Salmonella* and generalized across Enterobacteriaceae, mechanisms that regulate lipid A modifications in *E. cloacae* highlight variations that promote clinically important resistance levels. Furthermore, colistin heteroresistance has also been associated with *Klebsiella pneumoniae* (48), another Enterobacteriaceae family member, which highlights the importance of studying antimicrobial resistance mechanisms at the species and strain level.

## Materials and Methods

### Bacterial Strains and Growth

*E. cloacae* subsp. *cloacae* ATCC 13047 and ECC strains were initially grown from freezer stocks on Luria-Bertani (LB) agar. Isolated colonies were used to inoculate LB broth or N minimal medium (0.1M Bis-Tris, pH 7.5 or 5.8, 5 mM KCl, 7.5 mM (NH<sub>4</sub>)<sub>2</sub>SO<sub>4</sub>, 0.5 M K<sub>2</sub>SO<sub>4</sub>, 1 mM KH<sub>2</sub>PO<sub>4</sub>, 0.10% casamino acids 0.2% glucose, 0.0002% thiamine, 15 μM FeSO<sub>4</sub>, 10 μM or 10 mM MgSO<sub>4</sub>) at 37° C. Kanamycin was used at 25 μg/ml for selection and colistin was used at

5 µg/ml or 10 µg/ml where indicated.

All strains and plasmids used in this study are listed in Table S1. Briefly, *E. cloacae* subsp. *cloacae* 13047 mutant strains were constructed as previously described using recombineering with the plasmid pKOBEG (49). Linear PCR products were introduced in to the *E. cloacae* ATCC 13047/pKOBEG strain by electroporation and plated on selective media. Selected clones were transformed with pCP20 to cure the antibiotic resistance cassette.

To complement *E. cloacae* mutants, the coding sequence from *phoPQ<sub>Ecl</sub>* was cloned into the Sall and KpnI sites in pMMBKn (3). To generate point mutants in PhoQ<sub>H277A</sub> and PhoQ<sub>D56A</sub>, site directed mutagenesis was performed using Pfu Turbo using primers that incorporated the associated alanine-encoded nucleotide replacement. All constructs were validated using Sanger sequencing. IPTG inducible constructs were transformed into the *phoPQ* mutant and grown in 2.0 mM IPTG to induce expression.

### Colony Forming Unit Counts

*E. cloacae* subsp. *cloacae* 13047 and mutant strains were initially grown from freezer stocks on Luria-Bertani (LB) agar. Isolated colonies were resuspended and used to inoculate LB broth with 10 µg/ml or without colistin at an OD<sub>600</sub> = 0.01. Cells were plated at designated time points on LB agar. Plates were grown overnight at 37° C and colony forming units (CFU) were counted and reported.

### Broth Microdilution assays



MICs of colistin were determined in triplicate by the broth microdilution (BMD) method. Briefly strains were inoculated from overnight cultures at an  $OD_{600} = 0.1$ . Various concentrations (0 - 256  $\mu\text{g/ml}$ ) of colistin were added to each well and cultures were incubated overnight. Growth was indicated by a reading the  $OD_{600}$  and the lowest concentration at which growth was inhibited was recorded as the MIC. *E. coli* W3110 and WD101 were used as control strains. In some cases, ‘skip wells’ were observed suggesting a heteroresistance phenomenon and the MIC was determined disregarding the clear wells (35).

### Population Analysis

Population analysis profiling was performed by plating a high inoculum ( $1 \times 10^{10}$  CFU) onto LB agar containing 1 to 64  $\mu\text{g/ml}$  colistin (in 2-fold increments). Plates were incubated overnight at 37° C and frequency of the subpopulation was determined by dividing by the total number of cells (50).

### Isolation of Lipid A

Isolation of lipid A for TLC analysis involved  $^{32}\text{P}$ -radiolabeling of whole cells was performed as previously described with slight modifications (51). In brief, 12.5 ml of *E. cloacae* was grown at 37° C to  $OD_{600} = 1.0$ . Bacteria were harvested by centrifugation at 10,000 X g for 10 min. Lipid A extraction was carried out by mild-acid hydrolysis as previously described (52).

### Mass Spectrometry

MS1 spectra of lipid A in Figure 4 were collected on a MALDI-TOF/TOF (Axima Performance, Shimadzu) mass spectrometer in the negative mode. All other spectra were collected in the

negative mode on a Thermo Scientific Orbitrap Fusion Lumos mass spectrometer (San Jose, CA, USA) modified with a Coherent ExciStar XS ArF excimer laser (Santa Clara, CA), as previously described (53). HCD was performed with the normalized collision energy (NCE) of 25%. UVPD was performed with the laser emitting 193 nm photons at 5 mJ per laser pulse with 5 pulses per scan. The laser pulse repetition rate was 500 Hz. The instrument was operated at 120000 resolving power with a precursor isolation window of 3  $m/z$ . All samples were dissolved in 50:50 MeOH:CHCl<sub>3</sub> and directly infused into the mass spectrometer via a static nano-electrospray ionization source. The presented spectra are an average of 50 scans.

#### **TLR-4 Signaling Assays**

HEK-Blue hTLR4, cell line was maintained according to the manufacturer specifications (Invivogen). Overnight bacterial cultures in stationary phase were serial diluted for assays as previously described (2, 3). At least two biological replicates were each done in triplicate and one representative set was shown.

#### **Colistin Survival Assays**

Polymyxin E survival assay analysis were performed as previously described with slight modifications (27). Wild type and mutant *E. cloacae* strains were grown overnight on LB agar. The following day, media N minimal medium with pH = 7.5, 10  $\mu$ M MgSO<sub>4</sub> were inoculated at OD<sub>600</sub> = 0.1 with bacteria from overnight cultures that were washed with N minimal media without Mg<sup>2+</sup> or iron. Cultures were grown until OD<sub>600</sub> = 0.6, when they were split and treated with 0, 5 or 10  $\mu$ g/ml of colistin (Polymyxin E). Cultures were incubated for 1 h at 37° C and then colony-forming units were plated and calculated. Percent survival was calculated by

dividing the number of bacteria after treatment with colistin relative to those incubated in the absence of colistin and then multiplied by 100.

## Protein Purification

To purify the PhoP<sub>Ecl</sub> protein, the coding sequence was cloned into pT7-7Kn, as previously described (7). Briefly the *phoP<sub>Ecl</sub>* CDS was amplified from *E. cloacae* cDNA with primers that added a C-terminal His<sub>8X</sub> tag. From an overnight starter culture, 1 Liter of LB broth containing 25 µg/ml of kanamycin was inoculated at 1:50 and grown at 37° C until the OD<sub>600</sub> = 0.5. IPTG was added to a final concentration of 1mM, and the culture was incubated at 37° C for an additional 4 h. Bacteria were recovered by centrifugation at 10,000 x g for 10 min, and the bacteria were resuspended in lysis buffer. Bacteria were lysed using sonication and the soluble fraction was recovered by centrifugation at 10,000 x g for 30 min. PhoP<sub>Ecl</sub>-His<sub>8X</sub> was purified on a Ni-nitrilotriacetic acid (NTA) beads according to the manufactures instructions (Qiagen).

## Electrophoretic Mobility Shift Assay

PhoP<sub>Ecl</sub>-His<sub>8X</sub> proteins were purified as described above. EMSAs were performed based on a modified protocol (6). 250-bp DNA fragments of *phoP<sub>Ecl</sub>* and *arnB<sub>Ecl</sub>* spanning -230 to +20 relative to the translational start site were amplified from *E. cloacae* or *E. coli* cDNA using 5'-biotinylated primers. PhoP<sub>Ecl</sub>-His<sub>8X</sub> proteins were incubated with biotinylated DNA at 25° C for 20 min. For competition experiments, unlabeled *E. cloacae* P<sub>arnB</sub> and poly (dI-dC) were added at 1:1, 2:1, or 5:1 ratios relative to biotin-labeled P<sub>arnB</sub> DNA, and 0.1 - 10 µM of PhoP<sub>Ecl</sub>-His<sub>8X</sub> proteins were used. After electrophoresis at 4° C, protein/DNA was transferred onto a positively

charged nylon membrane. Blots were blocked in 5% milk in TBS for 20 min and streptavidin conjugated HRP was used at a 1:300 dilution.

## **Nucleic Acid Extraction**

Total RNA was extracted using the Direct-Zol RNA MiniPrep Kit (Zymo Research) from *E. cloacae* grown to a final OD<sub>600</sub> = 0.6. Isolated RNA was treated with DNA-free DNA removal kit (Thermo-Fisher Scientific) to eliminate genomic DNA contamination. DNase-depleted RNA was used for qRT-PCR and RNA-seq.

## **RNA-sequencing**

RNA-sequencing was performed as previously described (54). Briefly, DNA-depleted RNA was processed for Illumina sequencing using the NEB Next Ultra Directional RNA Library Prep kit for Illumina as described by the manufacturer (NEB). Sequencing was performed using Illumina HiSeq. Sequencing data was aligned to the *E. cloacae* subs. *cloacae* ATCC 13047 published genome annotations (44) using CLC genomic workbench software (Qiagen) and RPKM expression values were determined. The weighted proportions fold change of expression values between samples was determined and a Baggerley's test on proportions was used to generate a false discovery rate corrected P-value. We then used a cut-off of 2-fold weighted proportions absolute change with a false-discovery rate corrected P-value of  $\leq 0.05$  to identify significantly differentially regulated genes between samples. The sequencing data for the clinical isolates has been deposited in the Nation Center for Biotechnology's Gene Expression Omnibus (PRJNA461875).

## Acknowledgements

This work was supported by NIH GM103655 (J.S.B), and Welch Foundation F-1155 (J.S.B.). Funding from the UT System for support of the UT System Proteomics Core Facility Network is gratefully acknowledged.

We would like to thank Cara Boutte and Mark Pellegrino for thoughtful review of the manuscript.

## References

1. Whitfield C, Trent MS. 2014. Biosynthesis and export of bacterial lipopolysaccharides. *Annu Rev Biochem* 83:99–128.
2. Needham BD, Carroll SM, Giles DK, Georgiou G, Whiteley M, Trent MS. 2013. Modulating the innate immune response by combinatorial engineering of endotoxin. *Proc Natl Acad Sci U S A* 110:1464–1469.
3. Boll JM, Crofts AA, Peters K, Cattoir V, Vollmer W, Davies BW, Trent MS. 2016. A penicillin-binding protein inhibits selection of colistin-resistant, lipooligosaccharide-deficient *Acinetobacter baumannii*. *Proc Natl Acad Sci U S A*.
4. Boll JM, Tucker AT, Klein DR, Beltran AM, Brodbelt JS, Davies BW, Trent MS. 2015. Reinforcing Lipid A Acylation on the Cell Surface of *Acinetobacter baumannii* Promotes Cationic Antimicrobial Peptide Resistance and Desiccation Survival. *mBio* 6:e00478-00415.
5. Needham BD, Trent MS. 2013. Fortifying the barrier: the impact of lipid A remodelling on bacterial pathogenesis. *Nat Rev Microbiol* 11:467–481.

- 498 6. Boll JM, Hendrixson DR. 2011. A specificity determinant for phosphorylation in a response  
499 regulator prevents in vivo cross-talk and modification by acetyl phosphate. *Proc Natl Acad*  
500 *Sci U S A* 108:20160–20165.
- 501 7. Boll JM, Hendrixson DR. 2013. A regulatory checkpoint during flagellar biogenesis in  
502 *Campylobacter jejuni* initiates signal transduction to activate transcription of flagellar  
503 genes. *mBio* 4:e00432-00413.
- 504 8. Raetz CRH, Reynolds CM, Trent MS, Bishop RE. 2007. Lipid A modification systems in gram-  
505 negative bacteria. *Annu Rev Biochem* 76:295–329.
- 506 9. Prost LR, Miller SI. 2008. The *Salmonellae* PhoQ sensor: mechanisms of detection of  
507 phagosome signals. *Cell Microbiol* 10:576–582.
- 508 10. Gunn JS. 2008. The *Salmonella* PmrAB regulon: lipopolysaccharide modifications,  
509 antimicrobial peptide resistance and more. *Trends Microbiol* 16:284–290.
- 510 11. Gao R, Stock AM. 2009. Biological insights from structures of two-component proteins.  
511 *Annu Rev Microbiol* 63:133–154.
- 512 12. Huynh TN, Noriega CE, Stewart V. 2010. Conserved mechanism for sensor phosphatase  
513 control of two-component signaling revealed in the nitrate sensor NarX. *Proc Natl Acad Sci*  
514 *U S A* 107:21140–21145.
- 515 13. García Vescovi E, Soncini FC, Groisman EA. 1996. Mg<sup>2+</sup> as an extracellular signal:  
516 environmental regulation of *Salmonella* virulence. *Cell* 84:165–174.

- 517 14. Bader MW, Sanowar S, Daley ME, Schneider AR, Cho U, Xu W, Klevit RE, Le Moual H, Miller  
518 SI. 2005. Recognition of antimicrobial peptides by a bacterial sensor kinase. *Cell* 122:461–  
519 472.
- 520 15. Gunn JS, Richards SM. 2007. Recognition and integration of multiple environmental signals  
521 by the bacterial sensor kinase PhoQ. *Cell Host Microbe* 1:163–165.
- 522 16. Herrera CM, Hankins JV, Trent MS. 2010. Activation of PmrA inhibits LpxT-dependent  
523 phosphorylation of lipid A promoting resistance to antimicrobial peptides. *Mol Microbiol*  
524 76:1444–1460.
- 525 17. Wösten MM, Kox LF, Chamnongpol S, Soncini FC, Groisman EA. 2000. A signal transduction  
526 system that responds to extracellular iron. *Cell* 103:113–125.
- 527 18. Perez JC, Groisman EA. 2007. Acid pH activation of the PmrA/PmrB two-component  
528 regulatory system of *Salmonella enterica*. *Mol Microbiol* 63:283–293.
- 529 19. Trent MS, Ribeiro AA, Lin S, Cotter RJ, Raetz CR. 2001. An inner membrane enzyme in  
530 *Salmonella* and *Escherichia coli* that transfers 4-amino-4-deoxy-L-arabinose to lipid A:  
531 induction on polymyxin-resistant mutants and role of a novel lipid-linked donor. *J Biol*  
532 *Chem* 276:43122–43131.
- 533 20. Gunn JS, Lim KB, Krueger J, Kim K, Guo L, Hackett M, Miller SI. 1998. PmrA-PmrB-regulated  
534 genes necessary for 4-aminoarabinose lipid A modification and polymyxin resistance. *Mol*  
535 *Microbiol* 27:1171–1182.

21. Zhou Z, Ribeiro AA, Lin S, Cotter RJ, Miller SI, Raetz CR. 2001. Lipid A modifications in polymyxin-resistant *Salmonella typhimurium*: PMRA-dependent 4-amino-4-deoxy-L-arabinose, and phosphoethanolamine incorporation. *J Biol Chem* 276:43111–43121.
22. Lee H, Hsu F-F, Turk J, Groisman EA. 2004. The PmrA-regulated pmrC gene mediates phosphoethanolamine modification of lipid A and polymyxin resistance in *Salmonella enterica*. *J Bacteriol* 186:4124–4133.
23. Bader MW, Sanowar S, Daley ME, Schneider AR, Cho U, Xu W, Klevit RE, Le Moual H, Miller SI. 2005. Recognition of antimicrobial peptides by a bacterial sensor kinase. *Cell* 122:461–472.
24. Miller SI, Kukral AM, Mekalanos JJ. 1989. A two-component regulatory system (phoP phoQ) controls *Salmonella typhimurium* virulence. *Proc Natl Acad Sci U S A* 86:5054–5058.
25. Richards SM, Strandberg KL, Conroy M, Gunn JS. 2012. Cationic antimicrobial peptides serve as activation signals for the *Salmonella Typhimurium* PhoPQ and PmrAB regulons in vitro and in vivo. *Front Cell Infect Microbiol* 2:102.
26. Kawasaki K, Ernst RK, Miller SI. 2005. Inhibition of *Salmonella enterica* serovar Typhimurium lipopolysaccharide deacylation by aminoarabinose membrane modification. *J Bacteriol* 187:2448–2457.
27. Rubin EJ, Herrera CM, Crofts AA, Trent MS. 2015. PmrD is required for modifications to *Escherichia coli* endotoxin that promote antimicrobial resistance. *Antimicrob Agents Chemother* 59:2051–2061.



28. Gunn JS, Miller SI. 1996. PhoP-PhoQ activates transcription of pmrAB, encoding a two-component regulatory system involved in *Salmonella typhimurium* antimicrobial peptide resistance. *J Bacteriol* 178:6857–6864.
29. Kato A, Groisman EA. 2004. Connecting two-component regulatory systems by a protein that protects a response regulator from dephosphorylation by its cognate sensor. *Genes Dev* 18:2302–2313.
30. Luo S-C, Lou Y-C, Rajasekaran M, Chang Y-W, Hsiao C-D, Chen C. 2013. Structural basis of a physical blockage mechanism for the interaction of response regulator PmrA with connector protein PmrD from *Klebsiella pneumoniae*. *J Biol Chem* 288:25551–25561.
31. Kox LF, Wösten MM, Groisman EA. 2000. A small protein that mediates the activation of a two-component system by another two-component system. *EMBO J* 19:1861–1872.
32. Morand PC, Billoet A, Rottman M, Sivadon-Tardy V, Eyrolle L, Jeanne L, Tazi A, Anract P, Courpied J-P, Poyart C, Dumaine V. 2009. Specific distribution within the *Enterobacter cloacae* complex of strains isolated from infected orthopedic implants. *J Clin Microbiol* 47:2489–2495.
33. Sanders WE, Sanders CC. 1997. *Enterobacter* spp.: pathogens poised to flourish at the turn of the century. *Clin Microbiol Rev* 10:220–241.
34. John JF, Sharbaugh RJ, Bannister ER. 1982. *Enterobacter cloacae*: bacteremia, epidemiology, and antibiotic resistance. *Rev Infect Dis* 4:13–28.

- 575 35. Guérin F, Isnard C, Sinel C, Morand P, Dhalluin A, Cattoir V, Giard J-C. 2016. Cluster-  
576 dependent colistin hetero-resistance in *Enterobacter cloacae* complex. *J Antimicrob*  
577 *Chemother* 71:3058–3061.
- 578 36. Mezzatesta ML, Gona F, Stefani S. 2012. *Enterobacter cloacae* complex: clinical impact and  
579 emerging antibiotic resistance. *Future Microbiol* 7:887–902.
- 580 37. Davin-Regli A, Pagès J-M. 2015. *Enterobacter aerogenes* and *Enterobacter cloacae*;  
581 versatile bacterial pathogens confronting antibiotic treatment. *Front Microbiol* 6:392.
- 582 38. Carlet J, Mainardi J-L. 2012. Antibacterial agents: back to the future? Can we live with only  
583 colistin, co-trimoxazole and fosfomycin? *Clin Microbiol Infect Off Publ Eur Soc Clin*  
584 *Microbiol Infect Dis* 18:1–3.
- 585 39. Nation RL, Li J. 2009. Colistin in the 21st century. *Curr Opin Infect Dis* 22:535–543.
- 586 40. Band VI, Crispell EK, Napier BA, Herrera CM, Tharp GK, Vavikolanu K, Pohl J, Read TD,  
587 Bosinger SE, Trent MS, Burd EM, Weiss DS. 2016. Antibiotic failure mediated by a resistant  
588 subpopulation in *Enterobacter cloacae*. *Nat Microbiol* 1:16053.
- 589 41. Napier BA, Band V, Burd EM, Weiss DS. 2014. Colistin Heteroresistance in *Enterobacter*  
590 *cloacae* Is Associated with Cross-Resistance to the Host Antimicrobial Lysozyme.  
591 *Antimicrob Agents Chemother* 58:5594–5597.
- 592 42. Kuper KM, Boles DM, Mohr JF, Wanger A. 2009. Antimicrobial susceptibility testing: a  
593 primer for clinicians. *Pharmacotherapy* 29:1326–1343.

- 594 43. Reis AO, Luz DAM, Tognim MCB, Sader HS, Gales AC. 2003. Polymyxin-resistant  
595 *Acinetobacter* spp. isolates: what is next? *Emerg Infect Dis* 9:1025–1027.
- 596 44. Ren Y, Ren Y, Zhou Z, Guo X, Li Y, Feng L, Wang L. 2010. Complete genome sequence of  
597 *Enterobacter cloacae* subsp. *cloacae* type strain ATCC 13047. *J Bacteriol* 192:2463–2464.
- 598 45. Park BS, Song DH, Kim HM, Choi B-S, Lee H, Lee J-O. 2009. The structural basis of  
599 lipopolysaccharide recognition by the TLR4-MD-2 complex. *Nature* 458:1191–1195.
- 600 46. Kawai T, Akira S. 2005. Pathogen recognition with Toll-like receptors. *Curr Opin Immunol*  
601 17:338–344.
- 602 47. Soncini FC, Vescovi EG, Groisman EA. 1995. Transcriptional autoregulation of the  
603 *Salmonella typhimurium* *phoPQ* operon. *J Bacteriol* 177:4364–4371.
- 604 48. Jayol A, Nordmann P, Brink A, Poirel L. 2015. Heteroresistance to colistin in *Klebsiella*  
605 *pneumoniae* associated with alterations in the *PhoPQ* regulatory system. *Antimicrob*  
606 *Agents Chemother* 59:2780–2784.
- 607 49. Guérin F, Isnard C, Cattoir V, Giard JC. 2015. Complex Regulation Pathways of AmpC-  
608 Mediated  $\beta$ -Lactam Resistance in *Enterobacter cloacae* Complex. *Antimicrob Agents*  
609 *Chemother* 59:7753–7761.
- 610 50. El-Halfawy OM, Valvano MA. 2015. Antimicrobial heteroresistance: an emerging field in  
611 need of clarity. *Clin Microbiol Rev* 28:191–207.

51. Hankins JV, Madsen JA, Giles DK, Childers BM, Klose KE, Brodbelt JS, Trent MS. 2011. Elucidation of a novel *Vibrio cholerae* lipid A secondary hydroxy-acyltransferase and its role in innate immune recognition. *Mol Microbiol* 81:1313–1329.
52. Zhou Z, Lin S, Cotter RJ, Raetz CR. 1999. Lipid A modifications characteristic of *Salmonella typhimurium* are induced by NH<sub>4</sub>VO<sub>3</sub> in *Escherichia coli* K12. Detection of 4-amino-4-deoxy-L-arabinose, phosphoethanolamine and palmitate. *J Biol Chem* 274:18503–18514.
53. Klein DR, Holden DD, Brodbelt JS. 2016. Shotgun Analysis of Rough-Type Lipopolysaccharides Using Ultraviolet Photodissociation Mass Spectrometry. *Anal Chem* 88:1044–1051.
54. Davies BW, Bogard RW, Young TS, Mekalanos JJ. 2012. Coordinated regulation of accessory genetic elements produces cyclic di-nucleotides for *V. cholerae* virulence. *Cell* 149:358–370.

## Figures

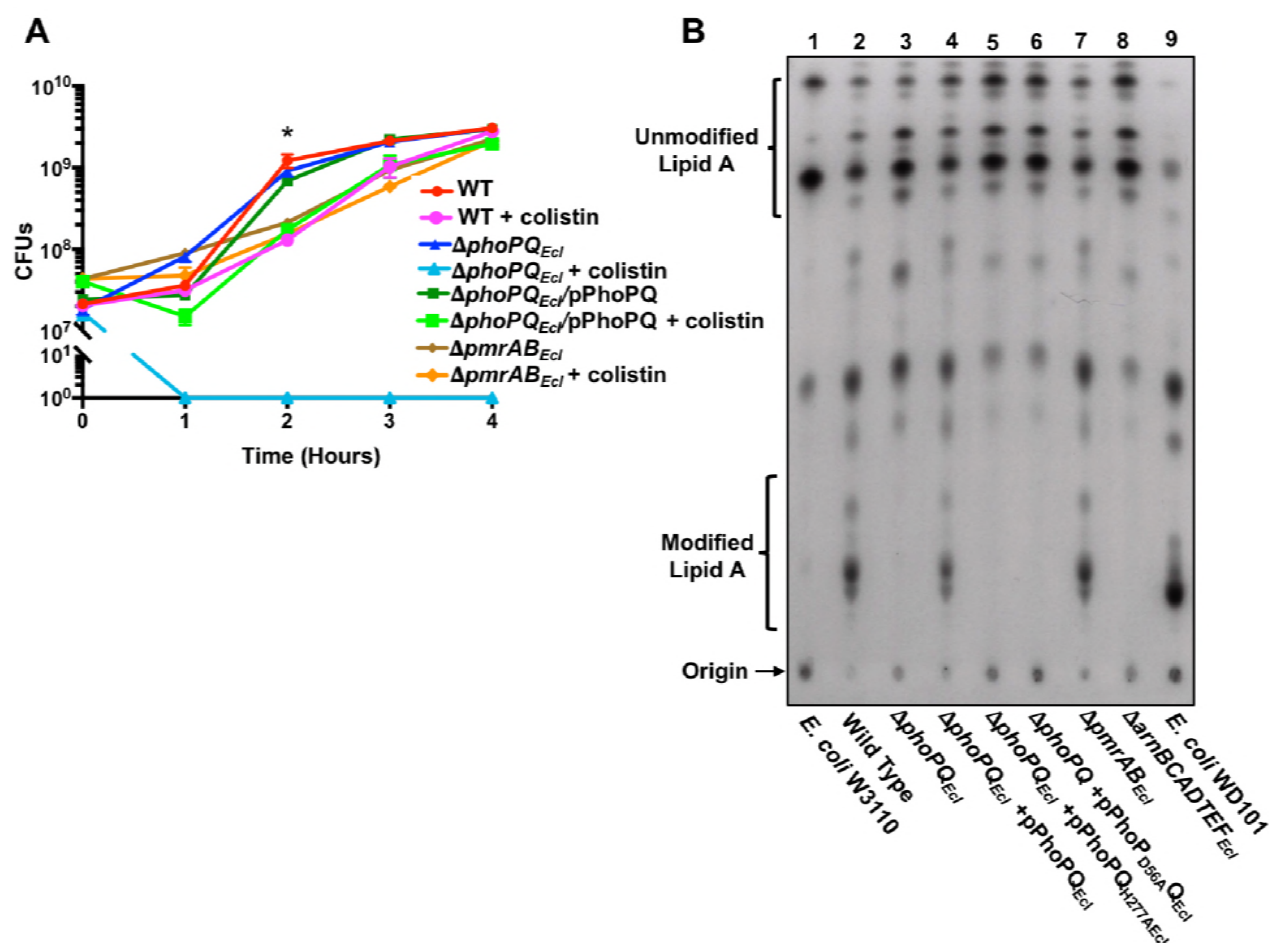

**Figure 1: Survival of colistin heteroresistant *E. cloacae* is dependent on PhoPQ, but not PmrAB-regulated lipid A modifications. (A)** *E. cloacae* logarithmic phase growth over time as measured by colony forming units (CFUs). At two hours, the growth rate between wild type grown in LB was significantly (\*) different from cells grown in LB + colistin (P value <0.05). **(B)** <sup>32</sup>P-radiolabeled lipid A was isolated from wild type and mutant *E. cloacae* strains and separated based on hydrophobicity using thin layer chromatography. Lipid A species are labeled as unmodified or modified as determined by *E. coli* W3110 (lane 1) and WD101 (lane 9) lipid A, respectively.

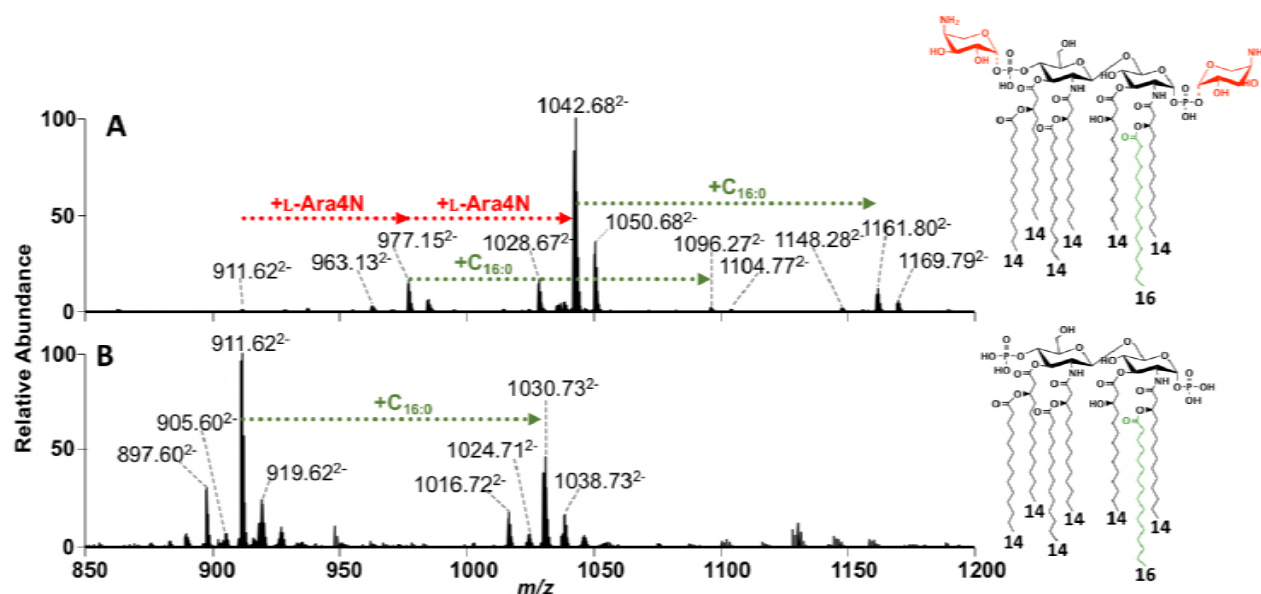

**Figure 2: Expanded MS1 spectra of (A) Wild type *E. cloacae* lipid A grown with colistin and (B)  $\Delta phoPQ_{Ecl}$  lipid A with the chemical structures associated with the lipid A modifications. The presence of aminoarabinose groups are denoted by L-Ara4N (red), while addition of palmitoyl groups are denoted by +C<sub>16:0</sub> (green). Hydroxylation is not illustrated, but is indicated by an  $m/z$  shift of 8 relative to doubly-charged lipid A ions in the spectra.**

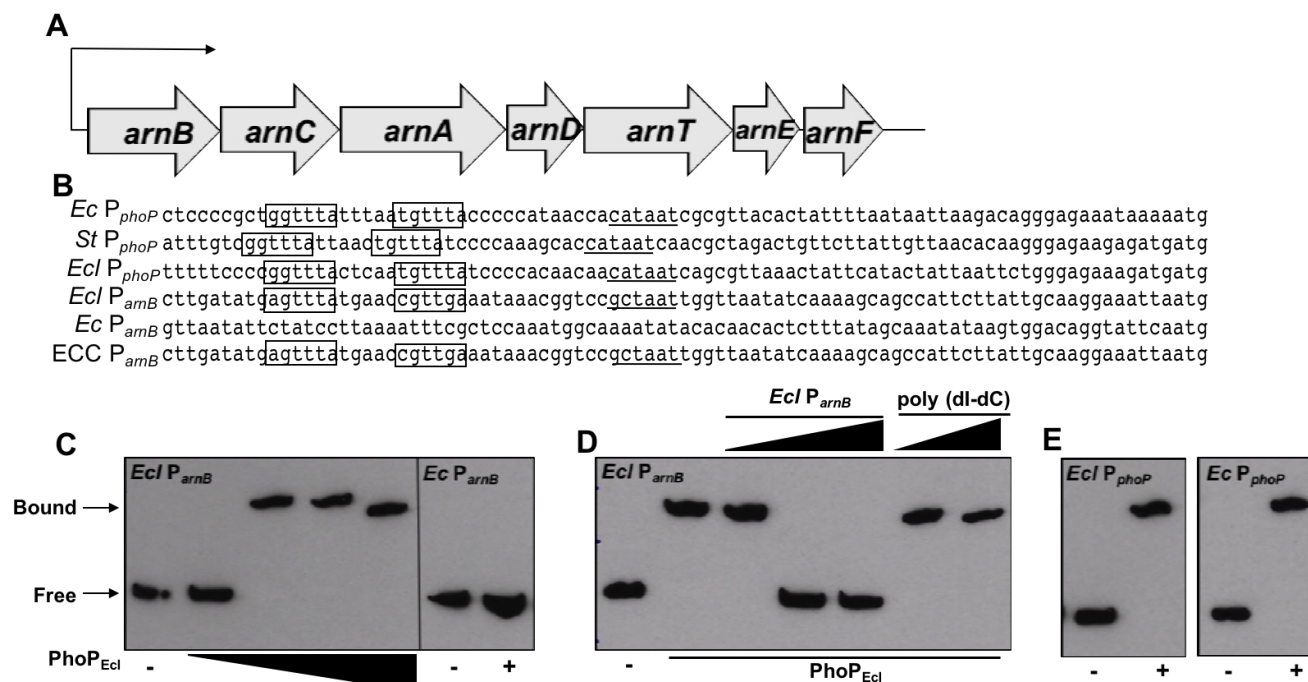

**Figure 3: PhoP<sub>Ecl</sub> binds to the *arnB* promoter of *E. cloacae* (*Ecl*), but not *E. coli* (*Ec*). (A)** Illustration of the *arn* operon organization. **(B)** Sequence alignment of the *phoP* promoter (*P<sub>phoP</sub>*) region in *Ec*, *Salmonella* (*St*), and *Ecl*, which each contain a PhoP box. The *arnB* promoter (*P<sub>arnB</sub>*) of *Ecl* contains a putative PhoP box binding site that is not present in *Ec*. The putative PhoP boxes have been boxed, while the -10 region is underlined. **(C)** Electrophoretic mobility shift assay (EMSA) of *Ecl P<sub>arnB</sub>* with increasing concentrations of PhoP<sub>Ecl</sub>. PhoP<sub>Ecl</sub> was used at concentrations of 0, 0.1, 1.0, 5.0 and 10.0 μM. EMSA using *Ec P<sub>arnB</sub>* in the absence or presence of PhoP<sub>Ecl</sub>, respectively. **(D)** EMSA competition experiments where increasing concentrations (1:1, 2:1, 5:1) of unlabeled *P<sub>arnB</sub>* competes with biotin-labeled *P<sub>arnB</sub>*, but nonspecific unlabeled poly (dl-dC) (2:1, 5:1) does not. **(E)** PhoP<sub>Ecl</sub> binds to both the *Ecl* and *Ec phoP* promoters.

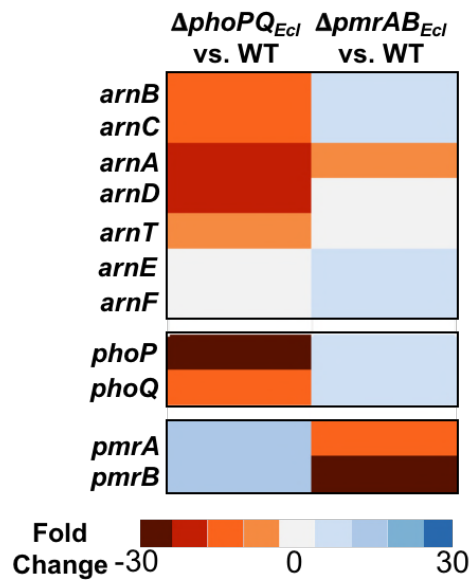

**Figure 4: RNA-sequencing analysis of *E. cloacae* genes.** Heat map illustrating the altered expression of select operons in  $\Delta phoPQ_{Ecl}$  and  $\Delta pmrAB_{Ecl}$  mutants. Expression is shown as a ratio of mutant to wild type expression ( $P < 0.05$ ).



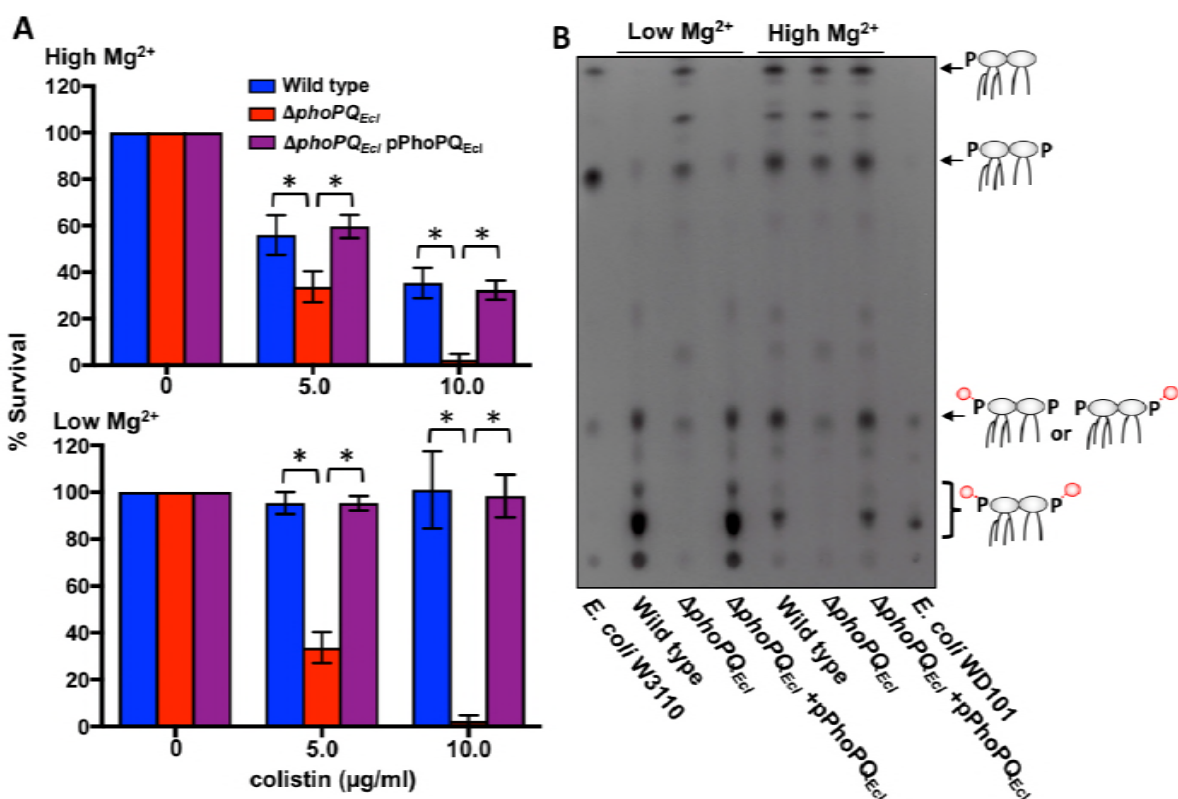

**Figure 5: PhoPQ<sub>Ecl</sub>-dependent activation of l-Ara4N addition induces colistin resistance in low Mg<sup>2+</sup>.** (A) Wild type and mutant *E. cloacae* strains were grown in N minimal medium with low (10 μM, top) or high (10mM, bottom) Mg<sup>2+</sup>. Strains were challenged with 0, 5, or 10 μg/ml of colistin for 1 h and plated for survival. Two biological replicates were each analyzed in triplicate with data from one representative set reported. *P* value <0.05. (B) <sup>32</sup>P-radiolabeled lipid A was isolated from wild type and mutant *E. cloacae* strains and separated based on hydrophobicity using thin layer chromatography. The associated lipid A structures are illustrated with red circles indicating L-Ara4N Addition. Lipid A species were labeled as determined by *E. coli* W3110 (unmodified) and WD101 (modified) lipid A.

**Table 1. MICs of colistin and PAP analysis for each *E. cloacae* mutant**

| Isolate                                 | MIC of colistin (µg/ml) by BMD <sup>b</sup> | MIC of colistin (µg/ml) by Etest | Frequency of appearance of subpopulations (PAPs <sup>a</sup> ) |                        |                        |                        |                        |                        |                        |
|-----------------------------------------|---------------------------------------------|----------------------------------|----------------------------------------------------------------|------------------------|------------------------|------------------------|------------------------|------------------------|------------------------|
|                                         |                                             |                                  | Concentration of colistin                                      |                        |                        |                        |                        |                        |                        |
|                                         |                                             |                                  | 1 µg/ml                                                        | 2 µg/ml                | 4 µg/ml                | 8 µg/ml                | 16 µg/ml               | 32 µg/ml               | 64 µg/ml               |
| Wild type                               | ≥256*                                       | 0.125**                          | 9.5 X 10 <sup>-3</sup>                                         | 6.3 X 10 <sup>-2</sup> | 5.2 X 10 <sup>-3</sup> | 7.5 X 10 <sup>-3</sup> | 7.6 X 10 <sup>-2</sup> | 6.3 X 10 <sup>-3</sup> | 9.3 10 <sup>-3</sup>   |
| ΔphoPQ <sub>Ecl</sub>                   | 0.5                                         | 0.125                            | 2.6 X 10 <sup>-3</sup>                                         | 0                      | 0                      | 0                      | 0                      | 0                      | 0                      |
| ΔphoPQ <sub>Ecl</sub>                   |                                             |                                  |                                                                |                        |                        |                        |                        |                        |                        |
| +pPhoPQ <sub>Ecl</sub>                  | ≥256*                                       | 0.125**                          | 3.6 X 10 <sup>-2</sup>                                         | 1.3 X 10 <sup>-2</sup> | 4.3 X 10 <sup>-3</sup> | 1.6 X 10 <sup>-2</sup> | 4.1 X 10 <sup>-3</sup> | 1.7 X 10 <sup>-3</sup> | 4.5 10 <sup>-4</sup>   |
| ΔphoPQ <sub>Ecl</sub>                   |                                             |                                  |                                                                |                        |                        |                        |                        |                        |                        |
| +pPhoPQ <sub>H277AEcl</sub>             | 0.5                                         | 0.125                            | 3.1 X 10 <sup>-2</sup>                                         | 0                      | 0                      | 0                      | 0                      | 0                      | 0                      |
| ΔphoPQ                                  |                                             |                                  |                                                                |                        |                        |                        |                        |                        |                        |
| +pPhoP <sub>D56A</sub> Q <sub>Ecl</sub> | 0.5                                         | 0.125                            | 7.4 X 10 <sup>-2</sup>                                         | 0                      | 0                      | 0                      | 0                      | 0                      | 0                      |
| ΔpmrAB <sub>Ecl</sub>                   | ≥256*                                       | 0.125**                          | 2.9 X 10 <sup>-2</sup>                                         | 1.8 X 10 <sup>-3</sup> | 7.7 X 10 <sup>-2</sup> | 9.2 X 10 <sup>-3</sup> | 5.5 X 10 <sup>-2</sup> | 1.3 X 10 <sup>-3</sup> | 2.3 X 10 <sup>-4</sup> |
| ΔarnT <sub>Ecl</sub>                    | 0.5                                         | 0.125                            | 4.0 X 10 <sup>-2</sup>                                         | 0                      | 0                      | 0                      | 0                      | 0                      | 0                      |

<sup>a</sup>PAP : Population Analysis Profile using an initial culture of 10<sup>10</sup> CFU/mL

<sup>b</sup>BMD : Broth microdilution method

\*Presence of skip wells

\*\* Presence of squatter colonies inside the zone of inhibition
